# Supplementary material
Source: MDPI journal article supplement (https://www.mdpi.com/2073-4433/12/3/340)
Supplement: s1 [file s1]

Group A

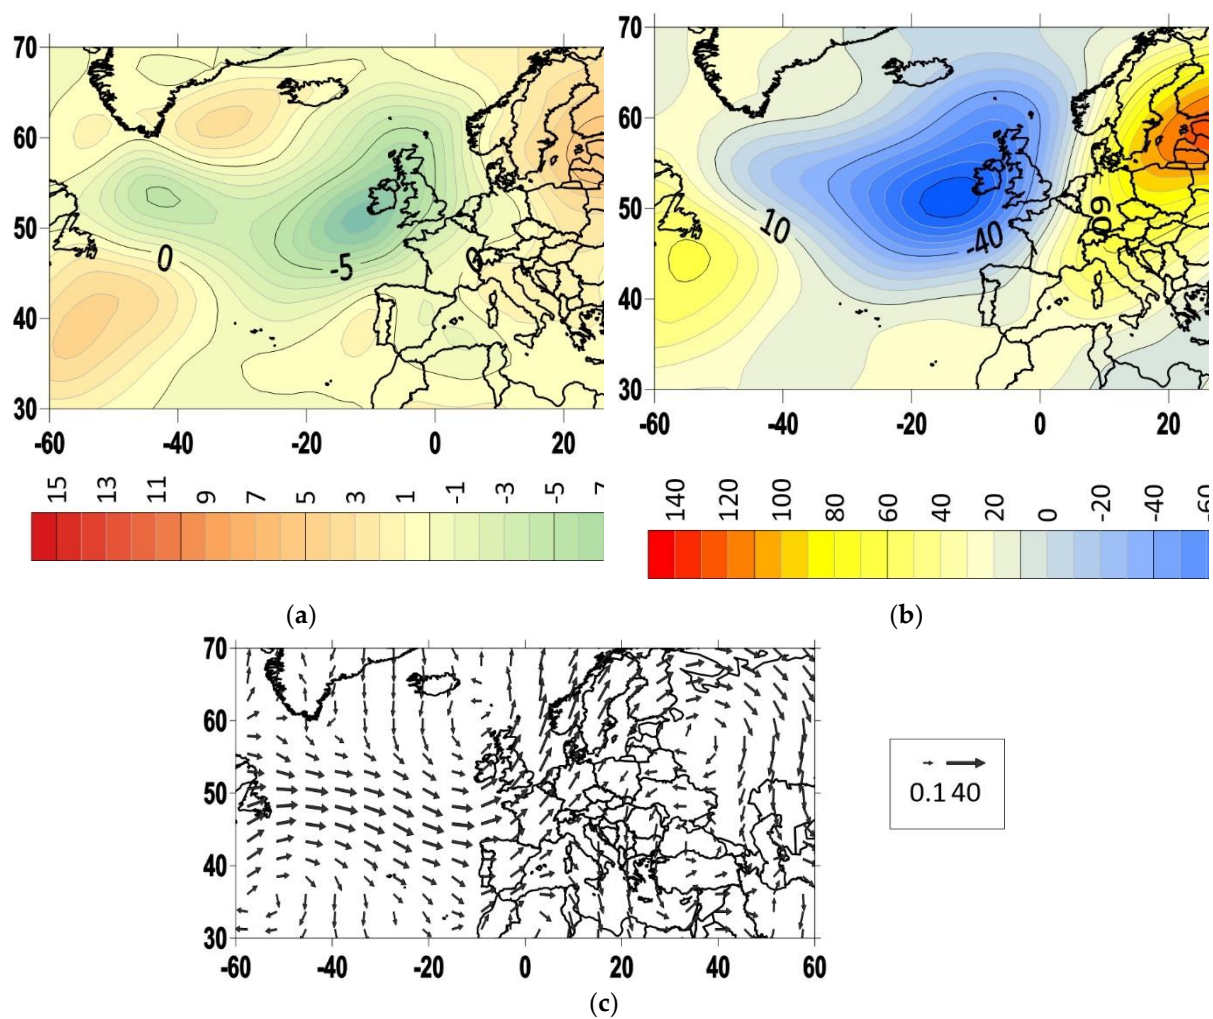

**Figure S1.** Average fields for the 2010 heat wave: (a) anomalies of SLP; (b) anomalies of HGT700 mb; (c) wind at 700 hPa level.

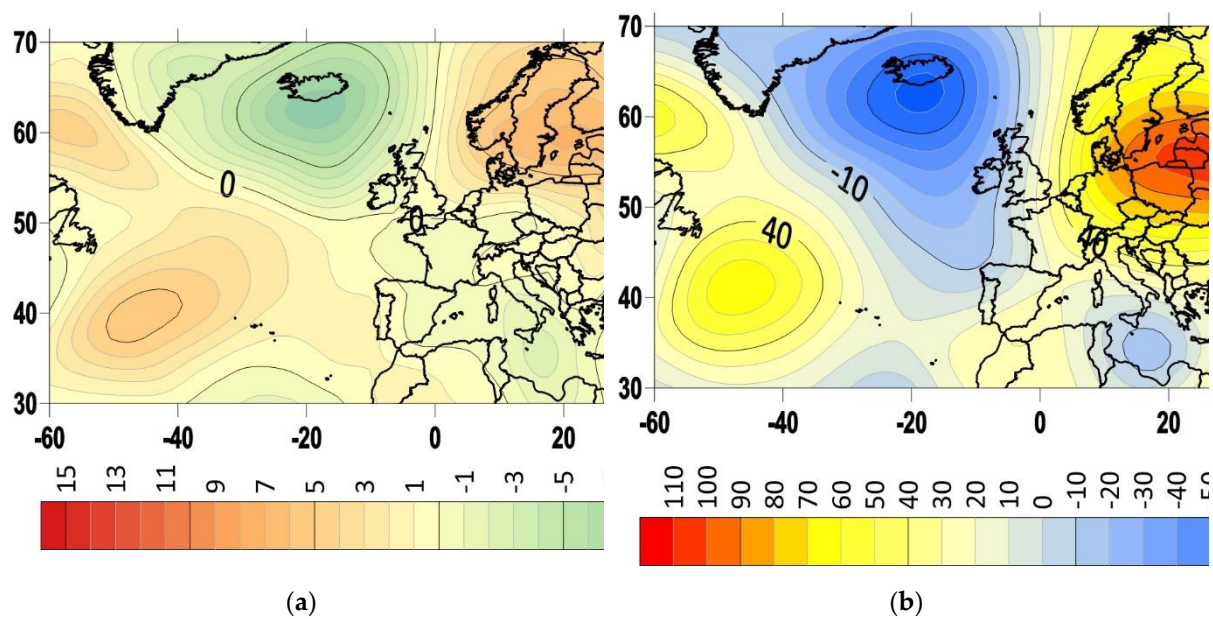

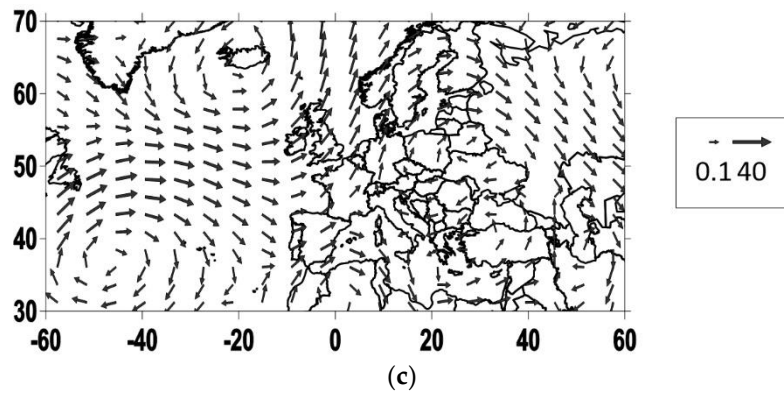

**Figure S2.** Average fields for the 2015 heat wave: (a) anomalies of SLP; (b) anomalies of HGT700 mb; (c) wind at 700 hPa level.

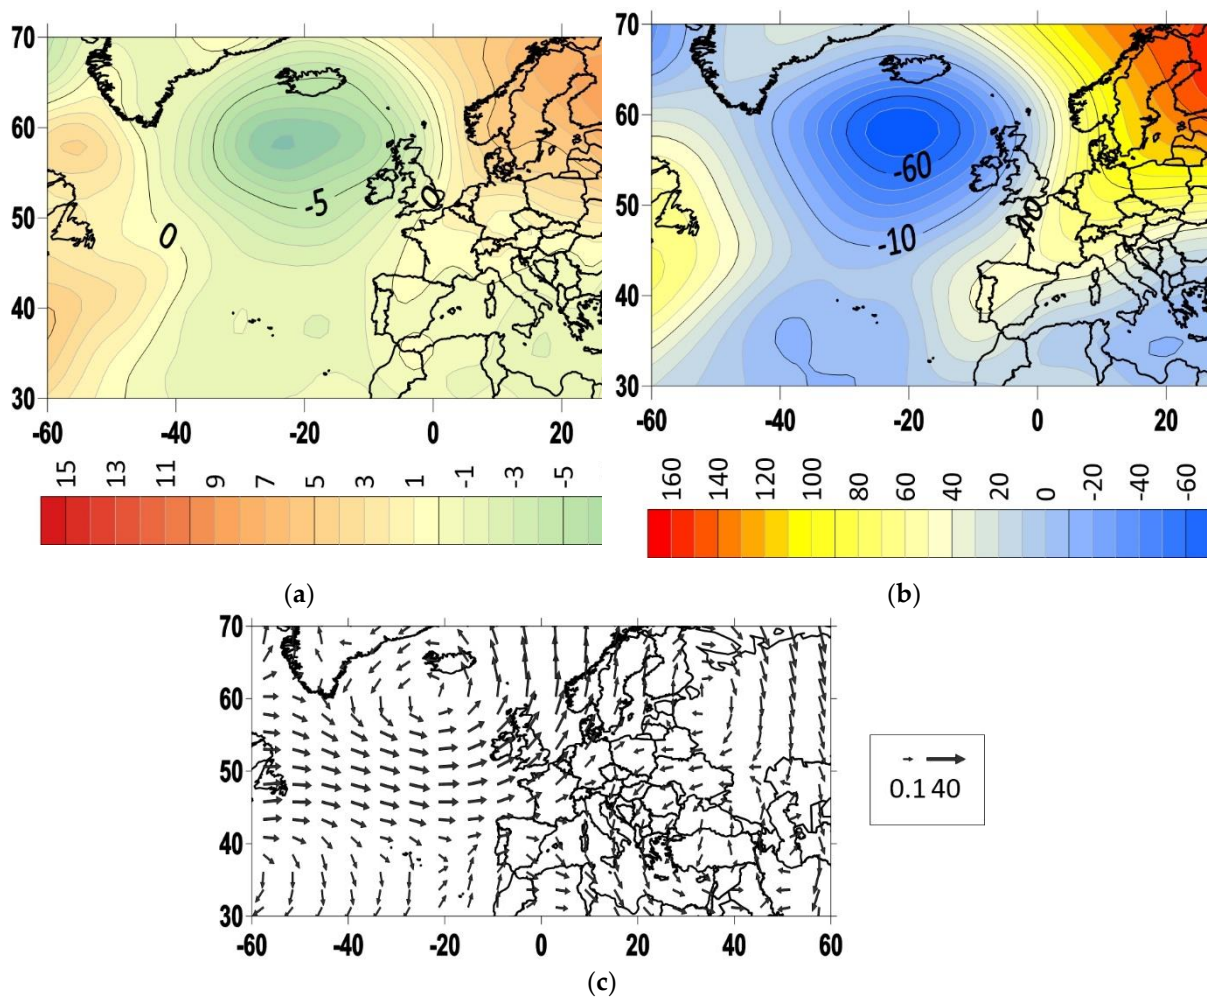

**Figure S3.** Average fields for the 2018 heat wave: (a) anomalies of SLP; (b) anomalies of HGT700 mb; (c) wind at 700 hPa level.

Group B



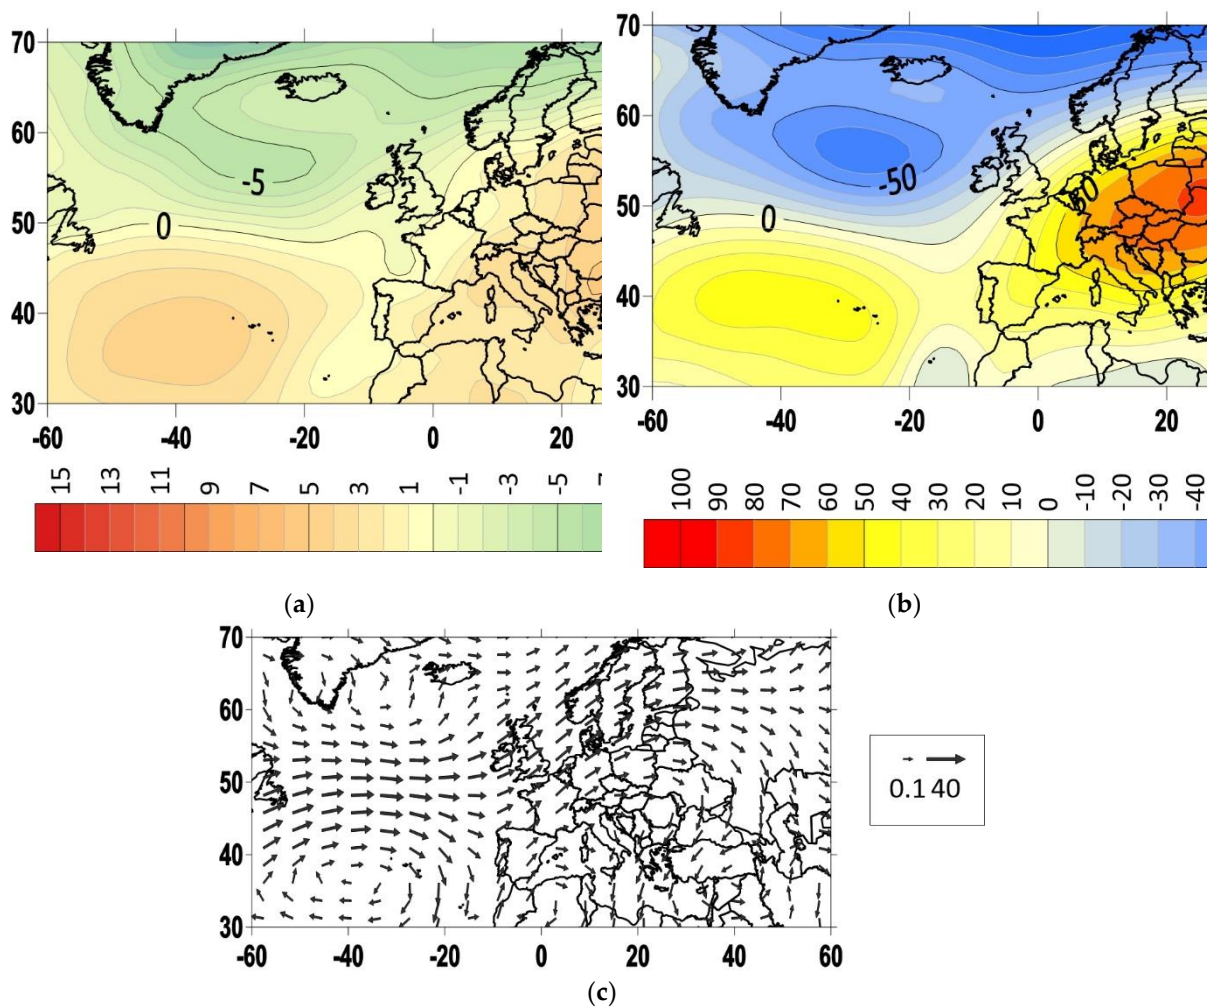

**Figure S4.** Average fields for the 1992 heat wave: (a) anomalies of SLP; (b) anomalies of HGT700 mb; (c) wind at 700 hPa level.

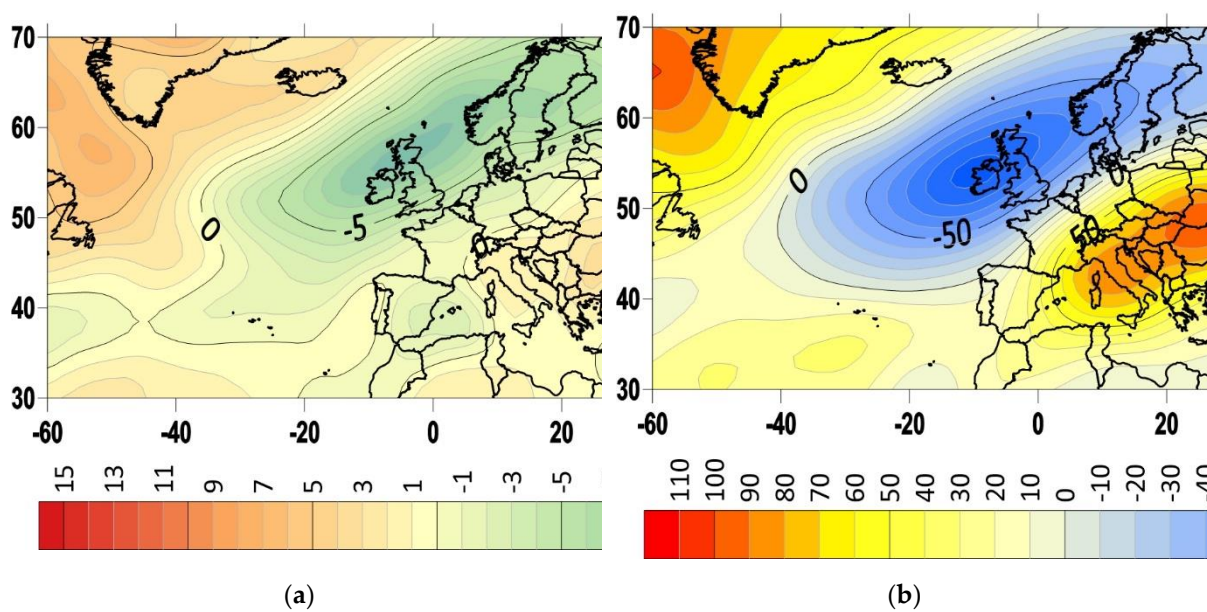

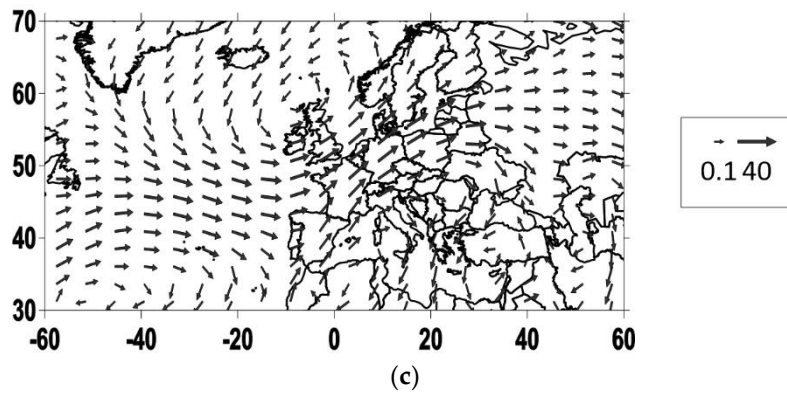

**Figure S5.** Average fields for the 2017 heat wave: (a) anomalies of SLP; (b) anomalies of HGT700 mb; (c) wind at 700 hPa level.

Group C

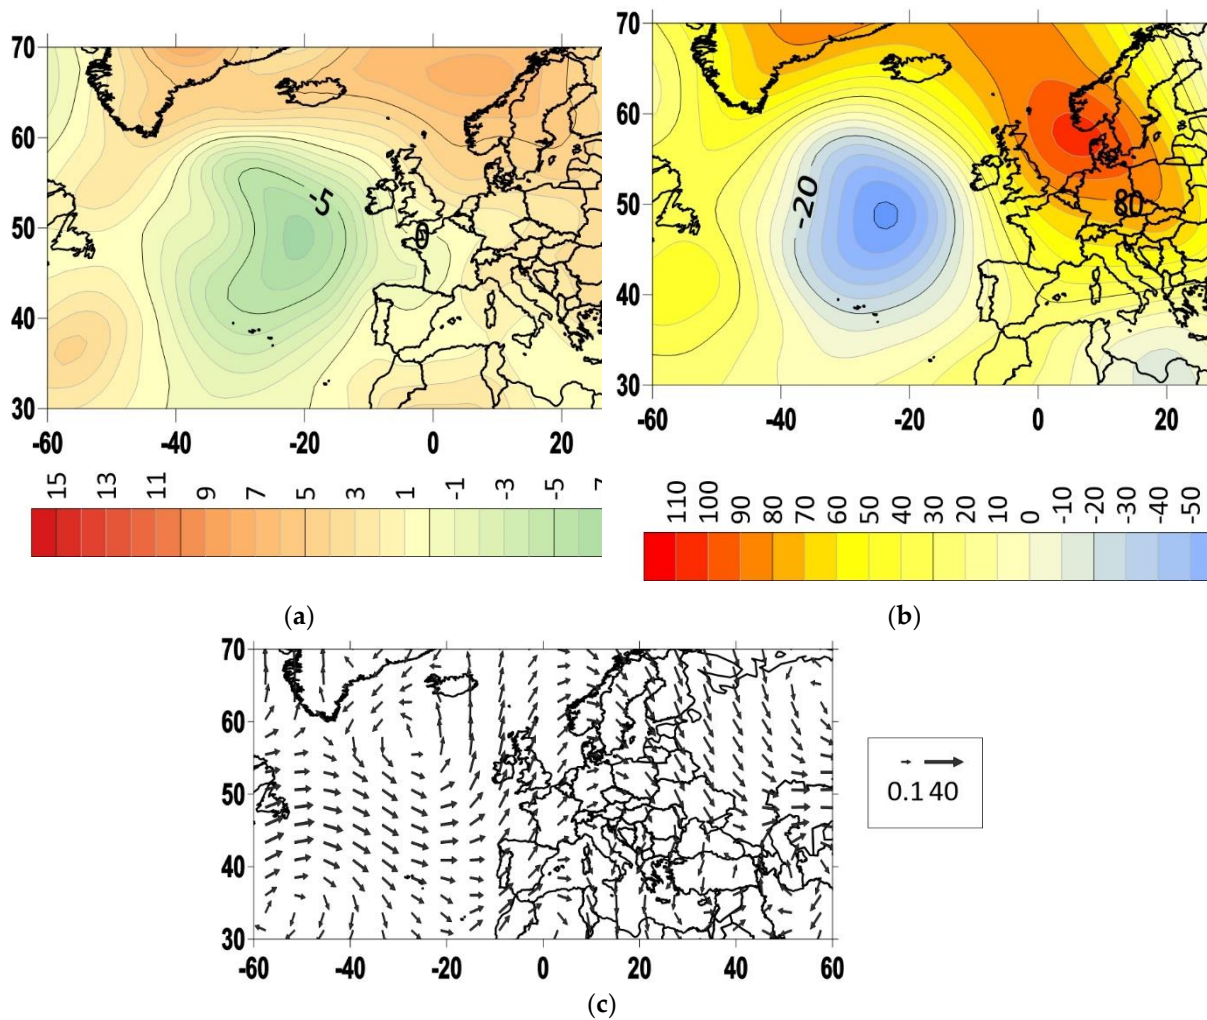

**Figure S6.** Average fields for the 2006b heat wave: (a) anomalies of SLP; (b) anomalies of HGT700 mb; (c) wind at 700 hPa level.

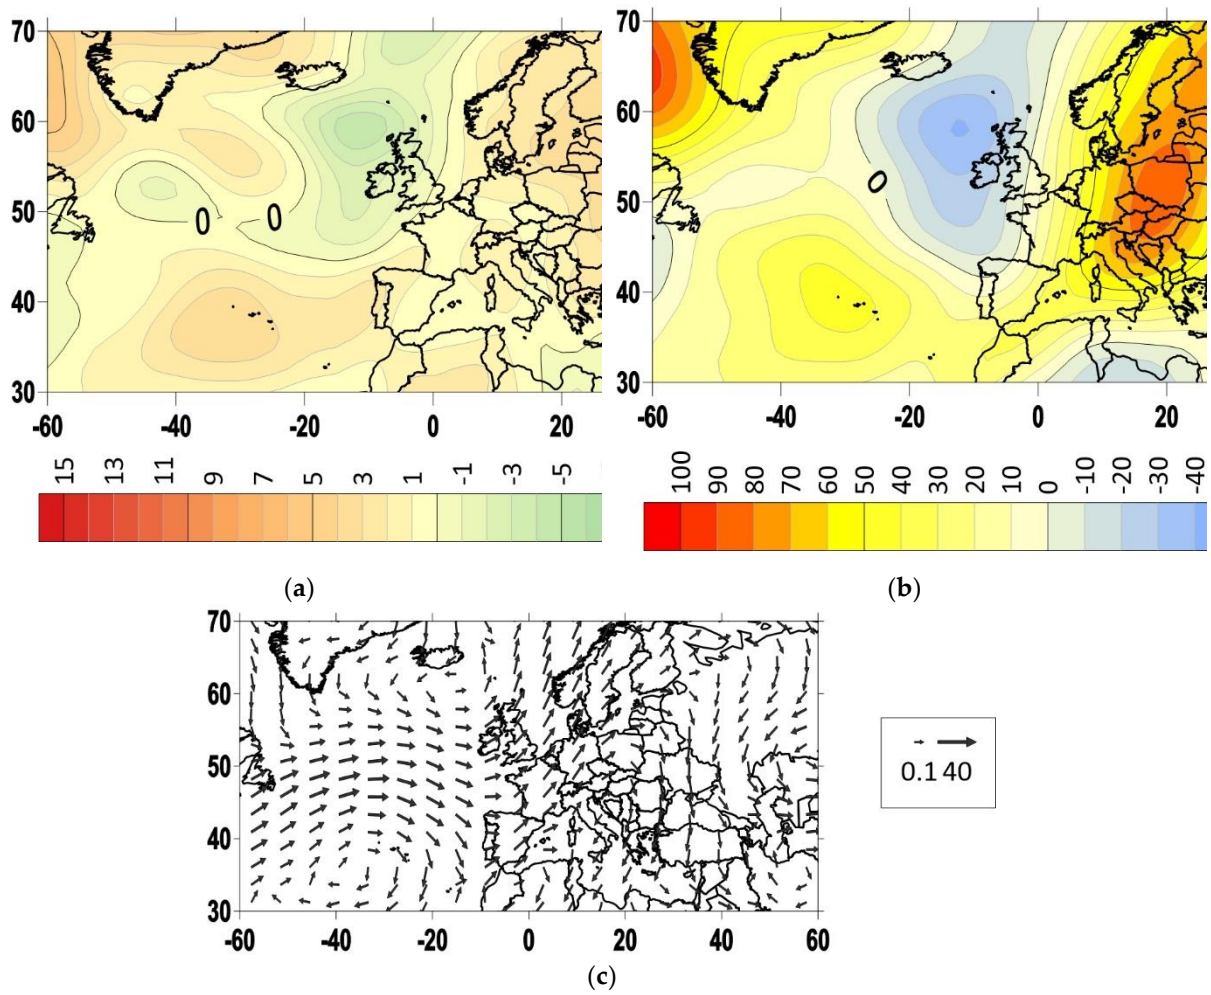

**Figure S7.** Average fields for the 2013 heat wave: (a) anomalies of SLP; (b) anomalies of HGT700 mb; (c) wind at 700 hPa level.
